# Supplementary material
Source: PubMed Central journal article supplement (PMC3222718)

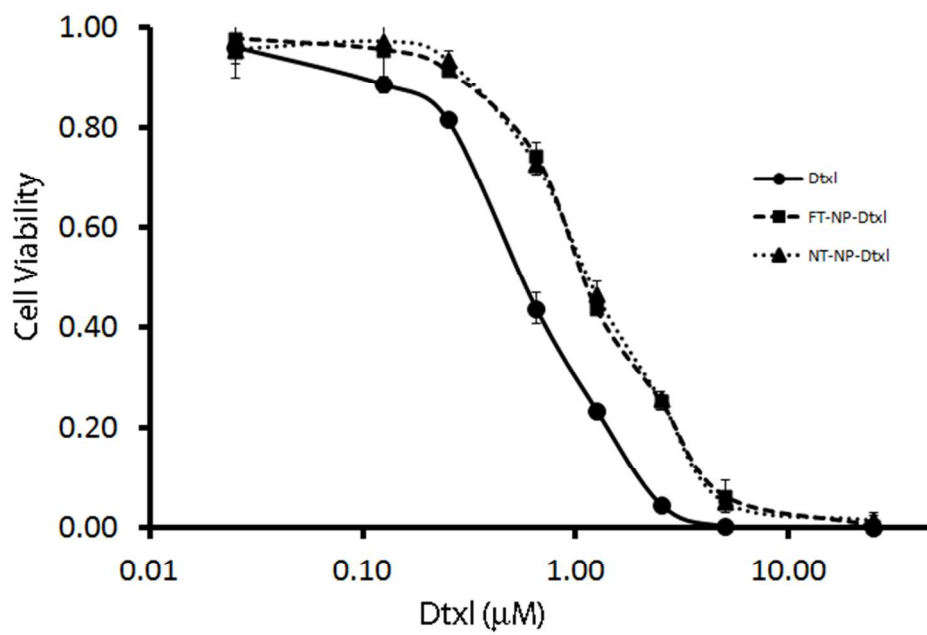

249x168mm (72 x 72 DPI)

Supplement: NIHMS334478-supplement-1_si_001.pdf [file NIHMS334478-supplement-1_si_001.pdf]
